# Supplementary material
Source: PubMed Central journal article supplement (PMC7976389)
Supplement: Supplementary_Data.pdf [file Supplementary_Data.pdf]

Figure S1. Chemical structural formula of gastrodin.

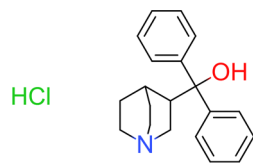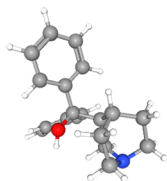

Gastrodin: 1-Azabicyclo[2.2.2]oct-3-yl(diphenyl)methanol hydrochloride

Table SI. Suzuki's criteria of hepatic ischemic reperfusion.

| Score | Congestion        | Vacuolation       | Necrosis             |
|-------|-------------------|-------------------|----------------------|
| 0     | -                 | -                 | -                    |
| 1     | Very mild (10%)   | Very mild (10%)   | Single cell necrosis |
| 2     | Mild (11-30%)     | Mild (11-30%)     | Mild (<30%)          |
| 3     | Moderate (31-60%) | Moderate (31-60%) | Moderate (31-60%)    |

Table SII. Reverse transcription-quantitative PCR primer sequences.

| Gene           | Forward primer (5'-3')   | Reverse primer (5'-3')  |
|----------------|--------------------------|-------------------------|
| Nrf2           | TCTTGGAGTAAGTCGAGAAGTGT  | GTTGAAACTGAGCGAAAAAGGC  |
| SOD            | AACCAGTTGTGTTGTCAGGAC    | CCACCATGTTTCTTAGAGTGAGG |
| HO-1           | AAGCCGAGAATGCTGAGTTCA    | GCCGTGTAGATATGGTACAAGGA |
| Bax            | TGAAGACAGGGGCCTTTTTG     | AATTCGCCGGAGACACTCG     |
| Bcl-2          | ATGCCTTTGTGGA ACTATATGGC | GGTATGCACCCAGAGTGATGC   |
| CASP-3         | TGGTGATGAAGGGGTCATTTATG  | TTCGGCTTTCCAGTCAGACTC   |
| $\beta$ -actin | GGCTGTATTCCCCTCCATCG     | CCAGTTGGTAACAATGCCATGT  |

CASP, caspase; HO, heme oxygenase; Nrf2, nuclear erythroid 2-related factor 2; SOD, superoxide dismutase.

Table SIII. Primer information.

---

| Genes          | GenBank<br>accession no. | Amplicon size<br>(number of bases) |
|----------------|--------------------------|------------------------------------|
| Nrf2           | NM_010902                | 140                                |
| SOD            | NM_011434                | 139                                |
| HO-1           | NM_010442                | 100                                |
| Bax            | NM_007527                | 140                                |
| Bcl-2          | NM_177410                | 120                                |
| CASP-3         | NM_009810                | 105                                |
| $\beta$ -actin | NM_007393                | 154                                |

---

CASP, caspase; HO, heme oxygenase; Nrf2, nuclear erythroid 2-related factor 2; SOD, superoxide dismutase.

---
